# Supplementary material
Source: HighWire-hosted journal article supplement (http://qualitysafety.bmj.com/highwire/filestream/162951/field_highwire_adjunct_files/0/bmjqs-2022-015538supp001_data_supplement.pdf)
Supplement: bmjqs-2022-015538supp001_data_supplement.pdf [file bmjqs-2022-015538supp001_data_supplement.pdf]

## **SUPPLEMENTAL MATERIAL 1. ADDITIONAL INFORMATION ON THE CLASSIFICATION OF THE PERSONAL CHARACTERISTICS AND PREGNANCY AND BIRTH CHARACTERISTICS**

### Personal characteristics:

- Maternal age at time of birth: <25/25-29/30-34/35-39/>40.
- Maternal ethnicity: Both parents are born in the Netherlands/Respondent and one or both her parents born abroad/Respondent born in the Netherlands, one or both her parents born abroad.
- Educational level at time of birth: Primary school, first three years of secondary school, or lower level of vocational training/Upper secondary school or higher vocational training/Bachelor, master or doctoral degree programs.
- Parity: nulliparous/multiparous.

### Pregnancy and birth characteristics:

- Singleton/multiple pregnancy.
- Responsible care provider at onset of pregnancy: midwife-led care/obstetrician-led care/general practitioner/other.
- Responsible care provider at onset of labour: midwife-led care/obstetrician-led care/general practitioner/no care provider.
- Onset of labour: spontaneous/spontaneous rupture of membranes, followed by an induction with tablets or oxytocin/rupture of membranes to induce labour/induction of labour with tablets, foley catheter or oxytocin/prelabour caesarean section.
- Mode of birth: spontaneous vaginal birth/spontaneous vaginal birth with episiotomy/vacuum or forceps/attempted vacuum or forceps, followed by caesarean section/caesarean section during labour/prelabour caesarean section.
- Pharmacological pain relief: no pain relief/epidural/remifentanil/epidural an remifentanil/other/epidural and 'other'/remifentanil and 'other'/epidural, remifentanil and 'other'.
- Actual place of birth: midwife-led care at home/midwife-led care at birth centre/midwife-led care at the hospital/obstetrician-led care at the hospital/other.
